# Supplementary material for: Cross-property deep transfer learning framework for enhanced predictive analytics on small materials data
Source: PubMed Central journal article supplement (PMC8594437; doi:10.1038/s41467-021-26921-5), 2021-11-15
Supplement: 41467_2021_26921_MOESM1_ESM.pdf [file 41467_2021_26921_MOESM1_ESM.pdf]

# **Supplementary Information: Cross-property deep transfer learning framework for enhanced predictive analytics on small materials data**

Vishu Gupta<sup>1</sup>, Kamal Choudhary<sup>2,3</sup>, Francesca Tavazza<sup>2</sup>, Carelyn Campbell<sup>2</sup>, Wei-keng Liao<sup>1</sup>, Alok Choudhary<sup>1</sup>, Ankit Agrawal<sup>1\*</sup>

<sup>1</sup>*Department of Electrical and Computer Engineering, Northwestern University*

<sup>2</sup>*Materials Measurement Laboratory, National Institute of Standards and Technology,  
Gaithersburg, MD,20899, U.S.A.*

<sup>3</sup>*Theiss Research, La Jolla, CA, 92037, U.S.A.*

\*Correspondence to Ankit Agrawal (email: [ankitag@eecs.northwestern.edu](mailto:ankitag@eecs.northwestern.edu)).

Supplementary Table 1: Data Size for each of the materials property used to train Source Model

| Dataset             | Property                       | Abbreviation | Size   |
|---------------------|--------------------------------|--------------|--------|
| OQMD                | Formation Energy_per_atom (eV) | Deltae       | 341450 |
| OQMD<br>-<br>JARVIS | Formation Energy (eV/atom)     | Deltae       | 321140 |
|                     | Band Gap (eV)                  | Bandgap      | 321140 |
|                     | Energy_per_atom (eV/atom)      | Total        | 321140 |
|                     | Stability                      | Stability    | 302313 |
|                     | Magnetic Moment ( $\mu_B$ )    | Magnom       | 183874 |
|                     | Volume_pa ( $\text{\AA}^3$ )   | Volume       | 321140 |

Supplementary Table 2: Data Size and Category for each of the materials property used to train the Target Model

| Dataset | Property                                                 | Abbreviation | Category                  | Size  |
|---------|----------------------------------------------------------|--------------|---------------------------|-------|
| JARVIS  | Kpoints Length Unit (Å)                                  | KLU          | Electronic-Structure      | 28171 |
|         | Kpoints Array Average (Å)                                | KAA          | Electronic-Structure      | 28163 |
|         | Bandgap Optb88vdw (eV)                                   | BgOptb       | Conductivity              | 28155 |
|         | Formation Energy (eV/atom)                               | Deltae       | Stability                 | 28108 |
|         | Encut (eV)                                               | Encut        | ElectroMagnetism          | 28056 |
|         | Ehull (eV/atom)                                          | Ehull        | Stability/Decay           | 27297 |
|         | Magmom Ozsizar ( $\mu_B$ )                               | MagOszi      | Magnetism                 | 25844 |
|         | Magmom Outcar ( $\mu_B$ )                                | MagOut       | Magnetism                 | 25357 |
|         | Eps Refractive Index (x)                                 | Eps          | Photo Optics              | 25150 |
|         | P Powerfact ( $W m^{-1} K^{-1}$ )                        | PPf          | Electricity               | 16760 |
|         | N Powerfact ( $W m^{-1} K^{-1}$ )                        | NPf          | Electricity               | 16763 |
|         | P Effective Masses 300K Average (kg)                     | PEM300K      | Conductivity              | 16250 |
|         | N Effective Masses 300K Average (kg)                     | NEM300K      | Conductivity              | 16250 |
|         | P Seebeck ( $\mu V / K$ )                                | PSb          | Thermoelectric            | 14439 |
|         | N Seebeck ( $\mu V / K$ )                                | NSb          | Thermoelectric            | 14144 |
|         | Meps Refractive Index (x)                                | Meps         | Photo Optics              | 11349 |
|         | Max (Phonon) Mode ( $cm^{-1}$ )                          | MaxM         | Mechanics                 | 10963 |
|         | Min (Phonon) Mode ( $cm^{-1}$ )                          | MinM         | Mechanics                 | 10930 |
|         | Elastic Tensor C11 (GPa)                                 | ETC11        | Elasticity                | 10839 |
|         | Elastic Tensor C12 (GPa)                                 | ETC12        | Elasticity                | 10759 |
|         | Elastic Tensor C13 (GPa)                                 | ETC13        | Elasticity                | 10846 |
|         | Elastic Tensor C22 (GPa)                                 | ETC22        | Elasticity                | 10832 |
|         | Elastic Tensor C33 (GPa)                                 | ETC33        | Elasticity                | 10856 |
|         | Elastic Tensor C44 (GPa)                                 | ETC44        | Elasticity                | 9986  |
|         | Elastic Tensor C55 (GPa)                                 | ETC55        | Elasticity                | 9755  |
|         | Elastic Tensor C66 (GPa)                                 | ETC66        | Elasticity                | 9739  |
|         | Bulk Modulus KV (GPa)                                    | Bulk         | Elasticity                | 10743 |
|         | Shear Modulus GV (GPa)                                   | Shear        | Elasticity                | 10209 |
|         | Bandgap MBJ (eV)                                         | BgMbj        | Conductivity              | 7296  |
|         | Spillage ( $\text{Å}^{-1}$ )                             | Spillage     | Spin-Orbit Coupling       | 3866  |
|         | SLME (%)                                                 | SLME         | Photovoltaic Efficiency   | 3006  |
|         | Max Ir Mode ( $cm^{-1}$ )                                | MaxIrM       | Electromagnetic Radiation | 2302  |
|         | Min Ir Mode ( $cm^{-1}$ )                                | MinIrM       | Electromagnetic Radiation | 2268  |
|         | Dfpt Piezo Max Dielectric Electronic ( $\epsilon_{11}$ ) | PMDIEI       | Electric Potential        | 2126  |
|         | Dfpt Piezo Max Dielectric ( $\epsilon_{11}$ )            | PMDI         | Electric Potential        | 2126  |
|         | Dfpt Piezo Max Dielectric Ironic ( $\epsilon_{11}$ )     | PMDIlo       | Electric Potential        | 2126  |
|         | Dfpt Piezo Max Eij ( $cm^{-2}$ )                         | PMEij        | Electric Potential        | 1123  |
|         | Dfpt Piezo Max Dij ( $cm^{-2}$ )                         | PMDij        | Electric Potential        | 689   |
|         | Exfoliation Energy (eV/atom)                             | Exfoli       | Mechanical Energy Cost    | 557   |

Supplementary Table 3: Modified target properties and their description

| Notation                        | Description                                    |
|---------------------------------|------------------------------------------------|
| Kpoints Array Average           | Average of the each entry in the Kpoints Array |
| Eps Refractive Index            | Square root of average of Epsx, Epsy, Epsz     |
| Meps Refractive Index           | Square root of average of Mepsx, Mepsy, Mepsz  |
| Max Mode                        | Maximum value of the Modes Array               |
| Min Mode                        | Minimum value of the Modes Array               |
| P Effective Masses 300K Average | Average of the P type Effective Masses at 300K |
| N Effective Masses 300K Average | Average of the N type Effective Masses at 300K |
| Elastic Tensor C11              | Elastic Tensor (ET) at (1,1) of the ET array   |
| Elastic Tensor C12              | Elastic Tensor (ET) at (1,2) of the ET array   |
| Elastic Tensor C13              | Elastic Tensor (ET) at (1,3) of the ET array   |
| Elastic Tensor C22              | Elastic Tensor (ET) at (2,2) of the ET array   |
| Elastic Tensor C33              | Elastic Tensor (ET) at (3,3) of the ET array   |
| Elastic Tensor C44              | Elastic Tensor (ET) at (4,4) of the ET array   |
| Elastic Tensor C55              | Elastic Tensor (ET) at (5,5) of the ET array   |
| Elastic Tensor C66              | Elastic Tensor (ET) at (6,6) of the ET array   |

Supplementary Table 4: Hyper-parameters used for ML algorithms

| ML algorithm           | Hyper-parameters                                                                                                              | # models |
|------------------------|-------------------------------------------------------------------------------------------------------------------------------|----------|
| Adaboost               | Default                                                                                                                       | 1        |
| Elastic Net            | Default                                                                                                                       | 1        |
| Linear Regression      | Default                                                                                                                       | 1        |
| SGD Regression         | Penalty: {'l1', 'l2', 'elastic net', 'none'} x L1_ratio: {0.01, 0.02, 0.10, 0.20, 0.50, 0.80} x Fit_intercept: {False / True} | 48       |
| Ridge                  | Solver: {'svd', 'cholesky', 'lsqr', 'sparse_cg', 'sag', 'saga'} x Normalize: {False / True} x Fit_intercept: {False / True}   | 24       |
| Support Vector Machine | C: {1, 2, 5, 10, 100, 1000} x Kernel: {'linear', 'poly', 'rbf'}                                                               | 18       |
| K-Neighbors            | N_neighbors: {2, 5, 10, 100} x Weights: {uniform / distance} x algorithm: {'ball_tree', 'kd_tree', 'brute'}                   | 24       |
| Decision Tree          | Max_depth: {2, 5, 10, 100, 1000} x Max_features: {'none', 'sqrt', 'log2'}                                                     | 15       |
| Extra Tree             | Max_depth: {10, 11, 12, 13, 14, 15, 16, 17, 18, 19, 20, 21, 22, 23, 24, 25}                                                   | 16       |
| Bagging                | Default                                                                                                                       | 1        |
| Random Forest          | Min_sample_split: {5, 10, 15, 20} x N_estimators: {100, 150, 200} x Max_depth: {10, 25}                                       | 24       |
| Lasso                  | Alpha: {'0.01', '0.02', '0.05', '0.10', '0.20', '0.05', '1.00', '2.00', '5.00', '10.00'}                                      | 10       |

Supplementary Table 5: Prediction performance benchmarking for the prediction task of "Multi Target Transfer Learning" using only formation energy as the source property. The table shows the validation MAE of different target materials properties for SC and TL models. All the model inputs are based on EF.

| Property | Base  | Scratch (SC) Models |            | Transfer Learning (TL) with Deltae as source property |                  |              |                 |              |
|----------|-------|---------------------|------------|-------------------------------------------------------|------------------|--------------|-----------------|--------------|
|          |       | SC: ML(EF)          | SC: DL(EF) | TL: ML(FeatExtr)                                      | TL: DL(FeatExtr) | TL: FineTune | TL: ModFineTune | TL: Freezing |
| KLU      | 19.03 | 12.01               | 11.83      | <b>11.35</b>                                          | 11.37            | 11.66        | 11.53           | 15.24        |
| KAA      | 5.027 | 2.957               | 2.972      | <b>2.857</b>                                          | <b>2.855</b>     | 2.895        | 2.899           | 3.971        |
| BgOptb   | 0.941 | 0.314               | 0.246      | 0.283                                                 | 0.217            | 0.215        | <b>0.211</b>    | 0.569        |
| Deltae   | 0.861 | 0.314               | 0.141      | 0.162                                                 | 0.126            | <b>0.120</b> | 0.124           | 0.234        |
| Encut    | 244.9 | <b>83.05</b>        | 88.89      | 105.6                                                 | 86.72            | 92.17        | 92.38           | 187.0        |
| Ehull    | 0.130 | 0.068               | 0.057      | 0.064                                                 | 0.053            | <b>0.050</b> | 0.052           | 0.069        |
| MagOszi  | 1.201 | 0.434               | 0.390      | 0.489                                                 | 0.354            | <b>0.341</b> | 0.361           | 0.727        |
| MagOut   | 1.251 | 0.459               | 0.403      | 0.466                                                 | 0.359            | 0.358        | <b>0.343</b>    | 0.806        |
| Eps      | 3.734 | 1.525               | 1.418      | 1.431                                                 | <b>1.263</b>     | 1.285        | 1.286           | 2.782        |
| PPf      | 649.6 | 514.8               | 514.9      | 494.7                                                 | <b>477.2</b>     | 488.8        | 487.6           | 596.6        |
| NPf      | 647.1 | 555.4               | 531.4      | 516.1                                                 | <b>496.5</b>     | 516.2        | 507.5           | 601.8        |
| PEM300K  | 1.972 | 1.277               | 1.225      | 1.208                                                 | 1.190            | <b>1.157</b> | 1.208           | 1.715        |
| NEM300K  | 1.972 | 1.277               | 1.235      | 1.208                                                 | <b>1.135</b>     | 1.159        | 1.221           | 1.717        |
| PSb      | 165.9 | 61.06               | 59.64      | 61.23                                                 | <b>53.02</b>     | 54.03        | 54.36           | 104.4        |
| NSb      | 111.8 | 57.70               | 54.23      | 56.73                                                 | <b>47.71</b>     | 50.16        | 50.47           | 84.11        |
| Meps     | 4.831 | 2.143               | 2.010      | 2.064                                                 | <b>1.840</b>     | 1.874        | 1.843           | 3.740        |
| MaxM     | 297.5 | 66.02               | 67.41      | 79.84                                                 | 61.95            | 65.23        | <b>59.05</b>    | 231.7        |
| MinM     | 37.08 | 22.60               | 21.25      | 22.53                                                 | <b>18.90</b>     | 20.52        | 20.46           | 23.23        |
| ETC11    | 78.65 | 40.11               | 35.90      | 34.88                                                 | <b>32.93</b>     | 35.09        | 33.18           | 74.80        |
| ETC12    | 43.26 | 18.66               | 17.17      | 16.58                                                 | <b>15.40</b>     | 16.07        | 16.01           | 40.43        |
| ETC13    | 41.20 | 17.55               | 15.36      | 14.70                                                 | 13.42            | <b>12.94</b> | 13.39           | 38.28        |
| ETC22    | 81.36 | 39.93               | 36.53      | 34.22                                                 | <b>31.83</b>     | 34.22        | 32.74           | 78.60        |
| ETC33    | 86.56 | 43.85               | 38.58      | 36.07                                                 | <b>33.43</b>     | 34.62        | 34.94           | 82.28        |
| ETC44    | 28.48 | 16.50               | 15.94      | 14.75                                                 | <b>13.73</b>     | 14.65        | 14.03           | 26.82        |
| ETC55    | 26.82 | 15.37               | 14.62      | 13.38                                                 | <b>12.48</b>     | 13.30        | 13.31           | 24.15        |
| ETC66    | 29.32 | 16.26               | 15.60      | 14.47                                                 | <b>13.16</b>     | 13.76        | 14.44           | 27.81        |
| Bulk     | 48.21 | 16.00               | 11.57      | 11.88                                                 | 10.92            | <b>10.62</b> | 11.45           | 45.85        |
| Shear    | 48.21 | 13.28               | 12.35      | 11.97                                                 | <b>11.19</b>     | 11.38        | 11.57           | 23.19        |
| BgMbj    | 1.742 | 0.734               | 0.529      | 0.608                                                 | <b>0.491</b>     | 0.492        | 0.519           | 1.168        |
| Spillage | 0.533 | 0.381               | 0.368      | 0.374                                                 | <b>0.343</b>     | 0.384        | 0.365           | 0.491        |
| SLME     | 9.233 | 6.579               | 6.914      | 6.824                                                 | <b>6.425</b>     | 6.653        | 6.646           | 8.376        |
| MaxlrM   | 485.5 | <b>85.81</b>        | 103.7      | 103.4                                                 | 96.80            | 100.2        | 98.78           | 406.9        |
| MinlrM   | 65.70 | 48.82               | 47.40      | 44.03                                                 | <b>42.25</b>     | 42.60        | 44.66           | 62.31        |
| PMDIEI   | 7.227 | 4.503               | 4.144      | 4.777                                                 | <b>3.712</b>     | 4.125        | 3.830           | 6.243        |
| PMDI     | 8.538 | 5.001               | 4.693      | 4.913                                                 | 4.421            | 4.635        | <b>4.277</b>    | 7.896        |
| PMDilo   | 2.477 | 0.892               | 0.849      | 0.928                                                 | <b>0.717</b>     | 0.804        | 0.770           | 2.125        |
| PMEij    | 0.455 | <b>0.306</b>        | 0.326      | 0.345                                                 | 0.333            | 0.417        | 0.388           | 0.392        |
| PMDij    | 43.66 | 28.52               | 28.27      | <b>27.51</b>                                          | 27.54            | 27.52        | 28.62           | 30.07        |
| Exfoli   | 79.49 | 65.04               | 66.97      | <b>58.44</b>                                          | 63.77            | 68.52        | 62.46           | 74.47        |

Supplementary Table 6: MAE of the ElemNet-based source models trained on different materials properties.

| Dataset     | Property                     | Size   | MAE    |
|-------------|------------------------------|--------|--------|
| OQMD-JARVIS | Formation Energy (eV/atom)   | 321140 | 0.0369 |
|             | Band Gap (eV)                | 321140 | 0.04   |
|             | Energy_per_atom (eV/atom)    | 321140 | 0.0476 |
|             | Stability (eV/atom)          | 302313 | 0.0412 |
|             | Magnetic Moment ( $\mu_B$ )  | 183874 | 0.1002 |
|             | Volume_pa ( $\text{\AA}^3$ ) | 321140 | 0.3636 |

Supplementary Table 7: Prediction performance benchmarking for the prediction task of "Multi Source Transfer Learning". The table shows the mean  $\pm$  standard deviation of MAE for different target properties from 10-fold cross-validation for all models. All the model inputs are based on EF. For each target property, the model with the best mean MAE value is identified by boldfacing its MAE and coloring its cell in grey. Further, the MAEs that were not statistically distinguishable from the best MAE at  $\alpha=0.05$  are also boldfaced (identified using the corrected resampled t-test<sup>1</sup>).

| Property | Base        | Scratch (SC) Models |                    | Transfer Learning (TL) with different source properties |                    |                    |                    |                    |                    |
|----------|-------------|---------------------|--------------------|---------------------------------------------------------|--------------------|--------------------|--------------------|--------------------|--------------------|
|          |             | SC: ML(EF)          | SC: DL(EF)         | Deltae                                                  | Bandgap            | Volume             | Total              | Magmom             | Stability          |
| KLU      | 19.14±0.17  | 11.77±0.30          | 11.63±0.26         | <b>11.28±0.27</b>                                       | 11.74±0.28         | <b>11.39±0.25</b>  | <b>11.33±0.29</b>  | 11.54±0.25         | 11.39±0.28         |
| KAA      | 5.105±0.080 | 2.930±0.052         | 2.983±0.061        | <b>2.811±0.068</b>                                      | 2.960±0.060        | 2.921±0.068        | <b>2.822±0.066</b> | 2.921±0.064        | 2.942±0.064        |
| BgOptb   | 0.949±0.012 | 0.328±0.009         | 0.249±0.011        | <b>0.229±0.010</b>                                      | 0.261±0.019        | 0.247±0.010        | <b>0.235±0.010</b> | <b>0.229±0.012</b> | <b>0.231±0.010</b> |
| Deltae   | 0.847±0.013 | 0.198±0.041         | 0.134±0.006        | <b>0.121±0.004</b>                                      | 0.152±0.004        | 0.138±0.005        | 0.130±0.004        | 0.141±0.004        | 0.135±0.005        |
| Encut    | 245.7±2.7   | <b>79.20±2.28</b>   | 85.94±2.21         | 99.29±4.43                                              | 88.78±3.82         | 85.15±2.94         | 86.21±3.79         | 86.07±2.94         | 85.57±3.04         |
| Ehull    | 0.133±0.003 | 0.069±0.002         | 0.057±0.002        | <b>0.052±0.002</b>                                      | 0.060±0.003        | 0.056±0.002        | 0.055±0.002        | 0.057±0.003        | 0.054±0.002        |
| MagOszi  | 1.231±0.021 | 0.462±0.022         | 0.423±0.026        | <b>0.385±0.027</b>                                      | 0.418±0.023        | 0.398±0.028        | 0.387±0.023        | <b>0.378±0.026</b> | 0.398±0.022        |
| MagOut   | 1.241±0.024 | 0.457±0.021         | 0.415±0.023        | <b>0.382±0.023</b>                                      | 0.406±0.015        | 0.393±0.016        | 0.387±0.021        | <b>0.374±0.010</b> | 0.409±0.020        |
| Eps      | 3.740±0.052 | 1.561±0.041         | 1.464±0.036        | <b>1.305±0.051</b>                                      | 1.462±0.033        | 1.381±0.047        | <b>1.277±0.026</b> | 1.350±0.032        | 1.317±0.030        |
| PPf      | 658.0±9.5   | 543.5±14.6          | 534.2±13.4         | <b>492.2±17.6</b>                                       | 514.3±14.3         | 527.1±17.8         | <b>496.4±16.6</b>  | 502.6±12.4         | <b>492.2±17.3</b>  |
| NPf      | 658.2±17.1  | 556.4±20.6          | 543.6±19.8         | <b>499.6±22.2</b>                                       | 524.5±19.1         | 527.6±23.8         | <b>496.8±23.5</b>  | 506.9±21.6         | <b>503.9±19.9</b>  |
| PEM300K  | 1.981±0.045 | 1.306±0.022         | 1.272±0.025        | 1.206±0.035                                             | 1.237±0.035        | 1.233±0.033        | <b>1.170±0.026</b> | 1.207±0.031        | 1.234±0.023        |
| NEM300K  | 1.981±0.045 | 1.306±0.022         | 1.273±0.023        | <b>1.173±0.024</b>                                      | 1.238±0.037        | 1.243±0.024        | <b>1.169±0.024</b> | 1.201±0.030        | 1.234±0.023        |
| PSb      | 163.3±2.2   | 64.84±2.97          | 61.24±2.33         | <b>54.71±2.13</b>                                       | 56.21±2.65         | 60.51±2.06         | <b>54.49±2.64</b>  | 57.34±2.36         | <b>55.29±2.53</b>  |
| NSb      | 109.3±1.9   | 58.22±2.35          | 54.75±2.23         | <b>49.03±1.99</b>                                       | 50.91±2.67         | 53.62±2.58         | <b>49.09±2.01</b>  | <b>50.47±2.61</b>  | <b>49.82±2.40</b>  |
| Meqs     | 4.928±0.106 | 2.173±0.067         | 2.051±0.053        | <b>1.904±0.056</b>                                      | 2.005±0.078        | 1.984±0.063        | <b>1.864±0.070</b> | 1.916±0.066        | <b>1.897±0.054</b> |
| MaxM     | 312.4±17.2  | 70.24±4.98          | 70.11±3.99         | <b>64.96±5.07</b>                                       | 74.60±4.98         | 67.08±5.12         | 68.03±5.55         | 67.87±5.55         | 68.26±5.69         |
| MinM     | 38.52±1.10  | 24.66±1.50          | 22.63±1.10         | <b>21.23±1.32</b>                                       | 23.41±1.30         | 22.29±1.13         | <b>21.20±0.95</b>  | 22.78±1.56         | <b>21.27±1.08</b>  |
| ETC11    | 81.07±2.77  | 39.96±1.84          | 36.05±1.76         | <b>32.04±1.32</b>                                       | 35.68±1.49         | 35.39±1.56         | <b>32.13±1.36</b>  | 34.38±1.44         | 33.95±1.34         |
| ETC12    | 43.39±1.32  | 19.54±0.78          | 17.86±0.64         | <b>16.26±0.74</b>                                       | 18.17±0.65         | 17.00±0.68         | <b>16.58±0.82</b>  | 17.14±0.69         | <b>16.59±0.83</b>  |
| ETC13    | 41.49±1.09  | 17.09±0.44          | 14.61±0.69         | 13.37±0.65                                              | 14.91±0.61         | 13.51±0.59         | <b>12.98±0.57</b>  | 13.77±0.62         | <b>13.33±0.40</b>  |
| ETC22    | 81.08±1.34  | 40.55±1.08          | 36.47±1.30         | <b>32.47±1.67</b>                                       | 36.34±1.47         | 34.17±1.74         | <b>32.34±1.79</b>  | 35.52±1.36         | <b>33.46±1.34</b>  |
| ETC33    | 85.12±2.02  | 42.77±2.12          | 38.15±1.64         | <b>33.99±1.65</b>                                       | 38.86±1.99         | 35.66±1.95         | <b>33.65±1.41</b>  | 35.55±1.96         | <b>33.51±1.68</b>  |
| ETC44    | 29.33±0.87  | 17.64±0.58          | 16.65±0.55         | <b>14.10±0.52</b>                                       | 16.57±0.55         | 14.93±0.55         | <b>14.39±0.52</b>  | 15.11±0.68         | <b>14.32±0.43</b>  |
| ETC55    | 27.54±0.95  | 15.44±0.71          | 15.05±0.76         | <b>12.59±0.68</b>                                       | 14.35±0.72         | 13.72±0.70         | 13.07±0.75         | 13.99±0.57         | 12.86±0.69         |
| ETC66    | 27.52±1.02  | 15.48±0.64          | 14.73±0.51         | 12.77±0.46                                              | 14.37±0.53         | 13.37±0.58         | 12.88±0.383        | 13.80±0.50         | <b>12.54±0.46</b>  |
| Bulk     | 48.39±0.90  | 16.66±0.40          | 12.02±0.46         | <b>11.42±0.56</b>                                       | 12.70±0.38         | <b>11.48±0.48</b>  | <b>11.26±0.41</b>  | <b>11.40±0.39</b>  | <b>11.26±0.41</b>  |
| Shear    | 27.30±7.37  | 13.72±0.53          | 12.29±0.46         | <b>10.51±0.46</b>                                       | 11.89±0.53         | 11.29±0.59         | <b>10.66±0.52</b>  | 11.33±0.40         | <b>10.57±0.53</b>  |
| BgMbj    | 1.843±0.051 | 0.723±0.041         | 0.546±0.025        | <b>0.530±0.032</b>                                      | <b>0.510±0.012</b> | 0.543±0.026        | <b>0.517±0.019</b> | <b>0.519±0.024</b> | 0.543±0.024        |
| Spillage | 0.496±0.028 | 0.368±0.019         | 0.359±0.019        | 0.362±0.018                                             | <b>0.351±0.017</b> | 0.357±0.013        | 0.367±0.019        | 0.368±0.021        | <b>0.335±0.020</b> |
| SLME     | 9.419±0.381 | 6.959±0.404         | 6.775±0.446        | 6.581±0.353                                             | <b>6.526±0.358</b> | 6.779±0.381        | 6.696±0.422        | <b>6.430±0.347</b> | <b>6.434±0.305</b> |
| MaxrM    | 445.5±35.7  | <b>96.98±12.30</b>  | 99.91±7.16         | 94.18±8.46                                              | 106.51±7.66        | 99.34±2.96         | <b>88.88±4.93</b>  | 94.69±9.05         | 101.30±6.04        |
| MinrM    | 66.00±3.70  | 46.74±4.93          | 42.16±3.52         | 42.08±1.77                                              | 41.99±2.97         | 41.05±2.97         | <b>39.73±3.59</b>  | 44.60±2.77         | <b>37.88±2.93</b>  |
| PMDIEI   | 6.814±0.471 | 4.363±0.555         | 4.116±0.408        | 4.128±0.511                                             | 4.532±0.567        | <b>3.880±0.470</b> | <b>3.903±0.383</b> | 4.372±0.505        | <b>3.788±0.423</b> |
| PMDI     | 8.124±0.410 | 4.937±0.517         | 4.714±0.390        | <b>4.498±0.532</b>                                      | 5.246±0.614        | 4.566±0.347        | <b>4.225±0.391</b> | 4.963±0.460        | <b>4.327±0.460</b> |
| PMDIlo   | 2.630±0.218 | 0.888±0.154         | 0.820±0.111        | <b>0.774±0.111</b>                                      | <b>0.815±0.116</b> | <b>0.819±0.157</b> | <b>0.778±0.109</b> | <b>0.813±0.096</b> | <b>0.796±0.104</b> |
| PMEIj    | 0.479±0.087 | 0.353±0.066         | <b>0.324±0.061</b> | 0.375±0.067                                             | <b>0.314±0.047</b> | <b>0.314±0.055</b> | 0.361±0.087        | <b>0.320±0.065</b> | <b>0.322±0.055</b> |
| PMDij    | 56.90±20.73 | 38.55±23.36         | <b>37.36±22.69</b> | <b>38.01±23.54</b>                                      | 38.36±23.41        | 84.32±50.63        | <b>37.99±23.49</b> | <b>38.08±23.56</b> | <b>38.06±23.15</b> |
| Exfoli   | 57.46±11.29 | 44.63±13.58         | <b>41.46±13.69</b> | <b>44.03±6.79</b>                                       | <b>44.29±11.30</b> | 55.45±13.85        | 59.91±13.15        | 48.04±9.39         | <b>49.20±6.42</b>  |

Supplementary Table 8: The table shows the best performing SC and TL models from Supplementary Table 7 that are used on the test set to get the results shown in Table 3. The notations for specific models used in this work are described in Table 1. For TL models, the source property used to get the best model and layer from which features were extracted (in case of FeatExtr method) is also mentioned. The model that gave a better test MAE (as in Table 3) is boldfaced.

| Property | Best Performing SC Model | Best Performing TL Model                    |
|----------|--------------------------|---------------------------------------------|
| KLU      | SC:DL(EF)                | <b>TL:ML(FeatExtr [Layer2]) { Deltae }</b>  |
| KAA      | SC:ML(EF)                | <b>TL:DL(FeatExtr [Layer3]) { Deltae }</b>  |
| BgOpib   | SC:DL(EF)                | <b>TL:ModFineTune { Deltae }</b>            |
| Deltae   | SC:DL(EF)                | <b>TL:FineTune { Deltae }</b>               |
| Encut    | <b>SC:ML(EF)</b>         | TL:DL(FeatExtr [Layer1]) { Volume }         |
| Ehull    | SC:DL(EF)                | <b>TL:FineTune { Deltae }</b>               |
| Magoszi  | SC:DL(EF)                | <b>TL:FineTune { Magmom }</b>               |
| Magout   | SC:DL(EF)                | <b>TL:ModFineTune { Magmom }</b>            |
| Eps      | SC:DL(EF)                | <b>TL:DL(FeatExtr [Layer2]) { Total }</b>   |
| PPF      | SC:DL(EF)                | <b>TL:DL(FeatExtr [Layer3]) { Stab }</b>    |
| NPF      | SC:DL(EF)                | <b>TL:DL(FeatExtr [Layer2]) { Total }</b>   |
| Pem300k  | SC:DL(EF)                | <b>TL:DL(FeatExtr [Layer2]) { Total }</b>   |
| Nem300k  | SC:DL(EF)                | <b>TL:DL(FeatExtr [Layer2]) { Total }</b>   |
| PSB      | SC:DL(EF)                | <b>TL:DL(FeatExtr [Layer2]) { Total }</b>   |
| NSB      | SC:DL(EF)                | <b>TL:DL(FeatExtr [Layer2]) { Deltae }</b>  |
| Meps     | SC:DL(EF)                | <b>TL:DL(FeatExtr [Layer2]) { Total }</b>   |
| MaxM     | SC:DL(EF)                | <b>TL:ModFineTune { Deltae }</b>            |
| MinM     | SC:DL(EF)                | <b>TL:DL(FeatExtr [Layer2]) { Total }</b>   |
| ETC11    | SC:DL(EF)                | <b>TL:DL(FeatExtr [Layer3]) { Deltae }</b>  |
| ETC12    | SC:DL(EF)                | <b>TL:DL(FeatExtr [Layer3]) { Deltae }</b>  |
| ETC13    | SC:DL(EF)                | <b>TL:DL(FeatExtr [Layer2]) { Total }</b>   |
| ETC22    | SC:DL(EF)                | <b>TL:DL(FeatExtr [Layer2]) { Total }</b>   |
| ETC33    | SC:DL(EF)                | <b>TL:DL(FeatExtr [Layer3]) { Stab }</b>    |
| ETC44    | SC:DL(EF)                | <b>TL:DL(FeatExtr [Layer3]) { Deltae }</b>  |
| ETC55    | SC:DL(EF)                | <b>TL:DL(FeatExtr [Layer3]) { Deltae }</b>  |
| ETC66    | SC:DL(EF)                | <b>TL:DL(FeatExtr [Layer3]) { Stab }</b>    |
| BulkKV   | SC:DL(EF)                | <b>TL:ModFineTune { Total }</b>             |
| ShearGV  | SC:DL(EF)                | <b>TL:DL(FeatExtr [Layer3]) { Deltae }</b>  |
| BgMbj    | SC:DL(EF)                | <b>TL:DL(FeatExtr [Layer2]) { Bandgap }</b> |
| Spillage | SC:DL(EF)                | <b>TL:DL(FeatExtr [Layer2]) { Stab }</b>    |
| SLME     | SC:DL(EF)                | <b>TL:DL(FeatExtr [Layer3]) { Magmom }</b>  |
| MaxrM    | SC:ML(EF)                | <b>TL:ModFineTune { Total }</b>             |
| MinrM    | SC:DL(EF)                | <b>TL:DL(FeatExtr [Layer2]) { Stab }</b>    |
| PMDIEI   | SC:DL(EF)                | <b>TL:DL(FeatExtr [Layer1]) { Stab }</b>    |
| PMDI     | SC:DL(EF)                | <b>TL:DL(FeatExtr [Layer2]) { Total }</b>   |
| PMDilo   | SC:DL(EF)                | <b>TL:DL(FeatExtr [Layer2]) { Deltae }</b>  |
| PMEij    | SC:DL(EF)                | <b>TL:DL(FeatExtr [Layer3]) { Bandgap }</b> |
| PMDij    | SC:DL(EF)                | <b>TL:ML(FeatExtr [Layer1]) { Total }</b>   |
| Exfoli   | SC:DL(EF)                | <b>TL:ML(FeatExtr [Layer3]) { Deltae }</b>  |



Supplementary Table 9: Prediction performance benchmarking for the prediction task of "Multi Source Transfer Learning". The table shows the mean  $\pm$  standard deviation of MAE for different target properties from 10-fold cross-validation for all models. The SC models are allowed to use PA as input as well, while TL models only use EF-based inputs. For each target property, the model with the best mean MAE value is identified by boldfacing its MAE and coloring its cell in grey. Further, the MAEs that were not statistically distinguishable from the best MAE at  $\alpha=0.05$  are also boldfaced (identified using the corrected resampled t-test<sup>1</sup>).

| Property | Base        | Scratch (SC) Models |                    |                    |                    | Transfer Learning (TL) with different source properties |                    |                    |                    |                    |                    |
|----------|-------------|---------------------|--------------------|--------------------|--------------------|---------------------------------------------------------|--------------------|--------------------|--------------------|--------------------|--------------------|
|          |             | SC: ML(EF)          | SC: ML(PA)         | SC: DL(EF)         | SC: DL(PA)         | Deltae                                                  | Bandgap            | Volume             | Total              | Magmom             | Stability          |
| KLU      | 19.14±0.17  | 11.77±0.30          | <b>10.79±0.24</b>  | 11.63±0.26         | 11.40±0.27         | 11.28±0.27                                              | 11.74±0.28         | 11.39±0.25         | 11.33±0.29         | 11.54±0.25         | 11.39±0.28         |
| KAA      | 5.105±0.080 | 2.930±0.052         | <b>2.667±0.039</b> | 2.983±0.061        | 2.837±0.045        | 2.811±0.068                                             | 2.960±0.060        | 2.921±0.068        | 2.822±0.066        | 2.921±0.064        | 2.942±0.064        |
| BgOptb   | 0.949±0.012 | 0.328±0.009         | 0.250±0.008        | 0.249±0.011        | 0.250±0.008        | <b>0.229±0.010</b>                                      | 0.261±0.019        | 0.247±0.010        | <b>0.235±0.010</b> | <b>0.229±0.012</b> | <b>0.231±0.010</b> |
| Deltae   | 0.847±0.013 | 0.198±0.041         | 0.157±0.004        | 0.134±0.006        | 0.166±0.002        | <b>0.121±0.004</b>                                      | 0.152±0.004        | 0.138±0.005        | 0.130±0.004        | 0.141±0.004        | 0.135±0.005        |
| Encut    | 245.7±2.7   | <b>79.20±2.28</b>   | 83.26±2.48         | 85.94±2.21         | 89.38±3.26         | 99.29±4.43                                              | 88.78±3.82         | 85.15±2.94         | 86.21±3.79         | 86.07±2.94         | 85.57±3.04         |
| Ehull    | 0.133±0.003 | 0.069±0.002         | 0.066±0.002        | 0.057±0.002        | 0.059±0.002        | <b>0.052±0.002</b>                                      | 0.060±0.003        | 0.056±0.002        | 0.055±0.002        | 0.057±0.003        | 0.054±0.002        |
| MagOszi  | 1.231±0.021 | 0.462±0.022         | 0.464±0.015        | 0.423±0.026        | 0.502±0.098        | <b>0.385±0.027</b>                                      | 0.418±0.023        | 0.398±0.028        | 0.387±0.023        | <b>0.378±0.026</b> | 0.398±0.022        |
| MagOut   | 1.241±0.024 | 0.457±0.021         | 0.465±0.024        | 0.415±0.023        | 0.546±0.149        | <b>0.382±0.023</b>                                      | 0.406±0.015        | 0.393±0.016        | 0.387±0.021        | <b>0.374±0.010</b> | 0.409±0.020        |
| Eps      | 3.740±0.052 | 1.561±0.041         | 1.298±0.026        | 1.464±0.036        | 1.472±0.037        | <b>1.305±0.051</b>                                      | 1.462±0.033        | 1.381±0.047        | <b>1.277±0.026</b> | 1.350±0.032        | 1.317±0.030        |
| PPf      | 658.0±9.5   | 543.5±14.6          | <b>493.5±14.1</b>  | 534.2±13.4         | 507.0±16.7         | <b>492.2±17.6</b>                                       | 514.3±14.3         | 527.1±17.8         | <b>496.4±16.6</b>  | 502.6±12.4         | <b>492.2±17.3</b>  |
| NPf      | 658.2±17.1  | 556.4±20.6          | <b>503.3±15.7</b>  | 543.6±19.8         | 517.6±17.5         | <b>499.6±22.2</b>                                       | 524.5±19.1         | 527.6±23.8         | <b>496.8±23.5</b>  | 506.9±21.6         | <b>503.9±19.9</b>  |
| PEM300K  | 1.981±0.045 | 1.306±0.022         | <b>1.119±0.028</b> | 1.272±0.025        | 1.231±0.016        | 1.206±0.035                                             | 1.237±0.035        | 1.233±0.033        | 1.170±0.026        | 1.207±0.031        | 1.234±0.023        |
| NEM300K  | 1.981±0.045 | 1.306±0.022         | <b>1.119±0.028</b> | 1.273±0.023        | 1.230±0.017        | 1.173±0.024                                             | 1.238±0.037        | 1.243±0.024        | 1.169±0.024        | 1.201±0.030        | 1.234±0.023        |
| PSb      | 163.3±2.2   | 64.84±2.97          | <b>55.11±1.97</b>  | 61.24±2.33         | 56.68±3.04         | <b>54.71±2.13</b>                                       | 56.21±2.65         | 60.51±2.06         | <b>54.49±2.64</b>  | 57.34±2.36         | <b>55.29±2.53</b>  |
| NSb      | 109.3±1.9   | 58.22±2.35          | <b>48.33±1.09</b>  | 54.75±2.23         | 52.18±2.16         | <b>49.03±1.99</b>                                       | 50.91±2.67         | 53.62±2.58         | <b>49.09±2.01</b>  | 50.47±2.61         | <b>49.82±2.40</b>  |
| Meps     | 4.928±0.106 | 2.173±0.067         | 1.938±0.075        | 2.051±0.053        | 2.085±0.063        | <b>1.904±0.056</b>                                      | 2.005±0.078        | 1.984±0.063        | <b>1.864±0.070</b> | 1.916±0.066        | <b>1.897±0.054</b> |
| MaxM     | 312.4±17.2  | 70.24±4.98          | <b>61.60±4.73</b>  | 70.11±3.99         | 65.48±5.39         | 64.96±5.07                                              | 74.60±4.98         | 67.08±5.12         | 68.03±5.55         | 67.87±5.55         | 68.26±5.69         |
| MinM     | 38.52±1.10  | 24.66±1.50          | 25.44±1.35         | 22.63±1.10         | <b>21.71±1.10</b>  | <b>21.23±1.32</b>                                       | 23.41±1.30         | 22.29±1.13         | <b>21.20±0.95</b>  | 22.78±1.56         | <b>21.27±1.08</b>  |
| ETC11    | 81.07±2.77  | 39.96±1.84          | 33.09±1.05         | 36.05±1.76         | 35.49±1.40         | <b>32.04±1.32</b>                                       | 35.68±1.49         | 35.39±1.56         | <b>32.13±1.36</b>  | 34.38±1.44         | 33.95±1.34         |
| ETC12    | 43.39±1.32  | 19.54±0.78          | <b>16.60±0.63</b>  | 17.86±0.64         | 17.60±0.60         | <b>16.26±0.74</b>                                       | 18.17±0.65         | 17.00±0.68         | <b>16.58±0.82</b>  | 17.14±0.69         | <b>16.59±0.83</b>  |
| ETC13    | 41.49±1.09  | 17.09±0.44          | <b>13.20±0.45</b>  | 14.61±0.69         | 14.10±0.45         | 13.37±0.65                                              | 14.91±0.61         | 13.51±0.59         | <b>12.98±0.57</b>  | 13.77±0.62         | <b>13.33±0.40</b>  |
| ETC22    | 81.08±1.34  | 40.55±1.08          | 33.37±1.10         | 36.47±1.30         | 35.90±1.47         | <b>32.47±1.67</b>                                       | 36.34±1.47         | 34.17±1.74         | <b>32.34±1.79</b>  | 35.52±1.36         | <b>33.46±1.34</b>  |
| ETC33    | 85.12±2.02  | 42.77±2.12          | <b>34.58±1.60</b>  | 38.15±1.64         | 36.92±1.69         | <b>33.99±1.65</b>                                       | 38.86±1.99         | 35.66±1.95         | <b>33.65±1.41</b>  | 35.55±1.96         | <b>33.51±1.68</b>  |
| ETC44    | 29.33±0.87  | 17.64±0.58          | 14.86±0.37         | 16.65±0.55         | 15.99±0.45         | <b>14.10±0.52</b>                                       | 16.57±0.55         | 14.93±0.55         | <b>14.39±0.52</b>  | 15.11±0.68         | <b>14.32±0.43</b>  |
| ETC55    | 27.54±0.95  | 15.44±0.71          | 13.19±0.39         | 15.05±0.76         | 14.30±0.53         | <b>12.59±0.68</b>                                       | 14.35±0.72         | 13.72±0.70         | 13.07±0.75         | 13.99±0.57         | 12.86±0.69         |
| ETC66    | 27.52±1.02  | 15.48±0.64          | 12.97±0.57         | 14.73±0.51         | 14.13±0.47         | 12.77±0.46                                              | 14.37±0.53         | 13.37±0.58         | 12.88±0.38         | 13.80±0.50         | <b>12.54±0.46</b>  |
| Bulk     | 48.39±0.90  | 16.66±0.40          | 12.35±0.43         | 12.02±0.46         | 12.68±0.51         | <b>11.42±0.56</b>                                       | 12.70±0.38         | <b>11.48±0.48</b>  | <b>11.26±0.41</b>  | <b>11.40±0.39</b>  | <b>11.26±0.41</b>  |
| Shear    | 27.30±7.37  | 13.72±0.53          | 11.24±0.42         | 12.29±0.46         | 12.12±0.50         | <b>10.51±0.46</b>                                       | 11.89±0.53         | 11.29±0.59         | <b>10.66±0.52</b>  | 11.33±0.40         | <b>10.57±0.53</b>  |
| BgMbj    | 1.843±0.051 | 0.723±0.041         | 0.572±0.026        | 0.546±0.025        | 0.577±0.015        | <b>0.530±0.032</b>                                      | <b>0.510±0.012</b> | 0.543±0.026        | <b>0.517±0.019</b> | <b>0.519±0.024</b> | 0.543±0.024        |
| Spillage | 0.496±0.028 | 0.368±0.019         | 0.368±0.014        | 0.359±0.019        | <b>0.348±0.020</b> | <b>0.362±0.012</b>                                      | <b>0.351±0.017</b> | 0.357±0.013        | 0.367±0.019        | 0.368±0.021        | <b>0.335±0.020</b> |
| SLME     | 9.419±0.381 | 6.959±0.404         | 6.810±0.190        | 6.775±0.446        | 6.862±0.444        | 6.581±0.353                                             | <b>6.526±0.358</b> | 6.779±0.381        | 6.696±0.422        | <b>6.430±0.347</b> | <b>6.434±0.305</b> |
| MaxlrM   | 445.5±35.7  | <b>96.98±12.30</b>  | <b>89.17±9.24</b>  | 99.91±7.16         | <b>87.36±8.29</b>  | <b>94.18±8.46</b>                                       | 106.51±7.66        | 99.34±2.96         | <b>88.88±4.93</b>  | <b>94.69±9.05</b>  | 101.30±6.04        |
| MinlrM   | 66.00±3.70  | 46.74±4.93          | <b>38.34±2.44</b>  | 42.16±3.52         | <b>39.17±3.23</b>  | 42.08±1.77                                              | 41.99±2.97         | 41.05±2.97         | <b>39.73±3.59</b>  | 44.60±2.77         | <b>37.88±2.93</b>  |
| PMDiEi   | 6.814±0.471 | 4.363±0.555         | 4.398±0.567        | 4.116±0.408        | <b>3.954±0.560</b> | 4.128±0.511                                             | 4.532±0.567        | <b>3.880±0.470</b> | <b>3.903±0.383</b> | 4.372±0.505        | <b>3.788±0.423</b> |
| PMDi     | 8.124±0.410 | 4.937±0.517         | 4.789±0.468        | 4.714±0.390        | 4.540±0.633        | <b>4.498±0.532</b>                                      | 5.246±0.614        | 4.566±0.347        | <b>4.225±0.391</b> | 4.963±0.460        | <b>4.327±0.460</b> |
| PMDilo   | 2.630±0.218 | 0.888±0.154         | 0.877±0.134        | 0.820±0.111        | 0.870±0.161        | <b>0.774±0.111</b>                                      | <b>0.815±0.116</b> | <b>0.819±0.157</b> | <b>0.778±0.109</b> | <b>0.813±0.096</b> | <b>0.796±0.104</b> |
| PMEij    | 0.479±0.087 | 0.353±0.066         | 0.442±0.070        | <b>0.324±0.061</b> | 0.345±0.067        | 0.375±0.067                                             | <b>0.314±0.047</b> | <b>0.314±0.055</b> | 0.361±0.087        | <b>0.320±0.065</b> | <b>0.322±0.055</b> |
| PMDij    | 56.90±20.73 | 38.55±23.36         | 38.91±22.94        | <b>37.36±22.69</b> | <b>34.27±22.57</b> | 38.01±23.54                                             | 38.36±23.41        | 84.32±50.63        | 37.99±23.49        | 38.08±23.56        | 38.06±23.15        |
| Exfoli   | 57.46±11.29 | <b>44.63±13.58</b>  | <b>43.42±9.78</b>  | <b>41.46±13.69</b> | <b>39.82±14.46</b> | <b>44.03±6.79</b>                                       | <b>44.29±11.30</b> | 55.45±13.85        | 59.91±13.15        | 48.04±9.39         | 49.20±6.42         |

Supplementary Table 10: The table shows the best performing SC and TL models from Supplementary Table 9 that are used on the test set to get the results shown in Table 4. The notations for specific models used in this work are described in Table 1. For TL models, the source property used to get the best model and layer from which features was extracted (in case of FeatExtr method) is also mentioned. The model that gave a better test MAE (as in Table 4) is boldfaced.

| Property | Best Performing SC Model | Best Performing TL Model            |
|----------|--------------------------|-------------------------------------|
| KLU      | SC:ML(PA)                | TL:ML/FeatExtr (Layer2) { Deltae }  |
| KAA      | SC:ML(PA)                | TL:DL/FeatExtr (Layer3) { Deltae }  |
| BgOpb    | SC:DL(EF)                | TL:ModFineTune { Deltae }           |
| Deltae   | SC:DL(EF)                | TL:FineTune { Deltae }              |
| Encut    | SC:ML(EF)                | TL:DL/FeatExtr (Layer1) { Volume }  |
| Ehull    | SC:DL(EF)                | TL:FineTune { Deltae }              |
| Magoszi  | SC:DL(EF)                | TL:FineTune { Magnom }              |
| Magout   | SC:DL(EF)                | TL:ModFineTune { Magnom }           |
| Eps      | SC:ML(PA)                | TL:DL/FeatExtr (Layer2) { Total }   |
| PPF      | SC:ML(PA)                | TL:DL/FeatExtr (Layer3) { Stab }    |
| NPF      | SC:ML(PA)                | TL:DL/FeatExtr (Layer2) { Total }   |
| Pem300k  | SC:ML(PA)                | TL:DL/FeatExtr (Layer2) { Total }   |
| Nem300k  | SC:ML(PA)                | TL:DL/FeatExtr (Layer2) { Total }   |
| PSB      | SC:ML(PA)                | TL:DL/FeatExtr (Layer2) { Total }   |
| NSB      | SC:ML(PA)                | TL:DL/FeatExtr (Layer2) { Deltae }  |
| Meps     | SC:ML(PA)                | TL:DL/FeatExtr (Layer2) { Total }   |
| MaxM     | SC:ML(PA)                | TL:ModFineTune { Deltae }           |
| MinM     | SC:DL(PA)                | TL:DL/FeatExtr (Layer2) { Total }   |
| ETC11    | SC:ML(PA)                | TL:DL/FeatExtr (Layer3) { Deltae }  |
| ETC12    | SC:ML(PA)                | TL:DL/FeatExtr (Layer3) { Deltae }  |
| ETC13    | SC:ML(PA)                | TL:DL/FeatExtr (Layer2) { Total }   |
| ETC22    | SC:ML(PA)                | TL:DL/FeatExtr (Layer2) { Total }   |
| ETC33    | SC:ML(PA)                | TL:DL/FeatExtr (Layer3) { Stab }    |
| ETC44    | SC:ML(PA)                | TL:DL/FeatExtr (Layer3) { Deltae }  |
| ETC55    | SC:ML(PA)                | TL:DL/FeatExtr (Layer3) { Deltae }  |
| ETC66    | SC:ML(PA)                | TL:DL/FeatExtr (Layer3) { Stab }    |
| BulkKV   | SC:DL(EF)                | TL:ModFineTune { Total }            |
| ShearGV  | SC:ML(PA)                | TL:DL/FeatExtr (Layer3) { Deltae }  |
| BgMbj    | SC:DL(EF)                | TL:DL/FeatExtr (Layer2) { Bandgap } |
| Spillage | SC:DL(PA)                | TL:DL/FeatExtr (Layer2) { Stab }    |
| SLME     | SC:DL(EF)                | TL:DL/FeatExtr (Layer3) { Magnom }  |
| MaxfrM   | SC:DL(PA)                | TL:ModFineTune { Total }            |
| MinfrM   | SC:ML(PA)                | TL:DL/FeatExtr (Layer2) { Stab }    |
| PMDiEi   | SC:DL(PA)                | TL:DL/FeatExtr (Layer1) { Stab }    |
| PMDi     | SC:DL(PA)                | TL:DL/FeatExtr (Layer2) { Total }   |
| PMDilo   | SC:DL(EF)                | TL:DL/FeatExtr (Layer2) { Deltae }  |
| PMEij    | SC:DL(EF)                | TL:DL/FeatExtr (Layer3) { Bandgap } |
| PMDij    | SC:DL(PA)                | TL:ML/FeatExtr (Layer1) { Total }   |
| Exfoli   | SC:DL(PA)                | TL:ML/FeatExtr (Layer3) { Deltae }  |

Supplementary Table 11: Prediction performance benchmarking for the prediction task of "Transfer Learning on Experimental Data". The table shows the mean  $\pm$  standard deviation of MAE for different target properties from 100-fold cross-validation for all models. The SC models are allowed to use PA as input as well, while TL models only use EF-based inputs. For each target property, the model with the best mean MAE value is identified by boldfacing its MAE and coloring its cell in grey. Further, the MAEs that were not statistically distinguishable from the best MAE at  $\alpha=0.05$  are also boldfaced (identified using the corrected resampled t-test <sup>1</sup>).

| Property<br>(Units):Size             | Scratch (SC) Models    |                        |                        |                        |                        |                        | Transfer Learning (TL) Models |                               |                               |                        |
|--------------------------------------|------------------------|------------------------|------------------------|------------------------|------------------------|------------------------|-------------------------------|-------------------------------|-------------------------------|------------------------|
|                                      | SC:ML(EF)              | SC:ML(PA)              | AutoML(EF)             | AutoML(PA)             | SC:DL(EF)              | SC:DL(PA)              | TL:ML(FeatExtr)               | TL:DL(FeatExtr)               | TL:FineTune                   | TL:ModFineTune         |
| Formation Enthalpy<br>(eV/atom):1643 | 0.1902<br>$\pm 0.0593$ | 0.1586<br>$\pm 0.0482$ | 0.2465<br>$\pm 0.0803$ | 0.1186<br>$\pm 0.0415$ | 0.1095<br>$\pm 0.0399$ | 0.1115<br>$\pm 0.0413$ | 0.0987<br>$\pm 0.0305$        | <b>0.0785</b><br>$\pm 0.0290$ | <b>0.0745</b><br>$\pm 0.0306$ | 0.0879<br>$\pm 0.0322$ |
| Band Gap<br>(eV):4920                | 0.5483<br>$\pm 0.1572$ | 0.4560<br>$\pm 0.1282$ | 0.4938<br>$\pm 0.1370$ | 0.3466<br>$\pm 0.0910$ | 0.3323<br>$\pm 0.1237$ | 0.3179<br>$\pm 0.1009$ | 0.4350<br>$\pm 0.1240$        | <b>0.2638</b><br>$\pm 0.1000$ | 0.3243<br>$\pm 0.1007$        | 0.3163<br>$\pm 0.0985$ |

Supplementary Table 12: The table shows the 95th percentile of the distribution of the absolute error ( $Q_{95}$ ) of the best models used in Tables 2-5 on the test set for each of the target materials properties.

| Property      | $Q_{95}$ for Best Model in Tables 2 and 5 |               | $Q_{95}$ for Best Model in Tables 3 and 5 |               | $Q_{95}$ for Best Model in Tables 4 and 5 |               |
|---------------|-------------------------------------------|---------------|-------------------------------------------|---------------|-------------------------------------------|---------------|
|               | Best SC Model                             | Best TL Model | Best SC Model                             | Best TL Model | Best SC Model                             | Best TL Model |
| KLU           | 35.27                                     | <b>32.90</b>  | 35.27                                     | <b>34.12</b>  | <b>29.24</b>                              | 34.12         |
| KAA           | 9.680                                     | <b>8.166</b>  | 9.680                                     | <b>8.882</b>  | <b>8.210</b>                              | 8.882         |
| BgOptb        | 1.576                                     | <b>1.283</b>  | 1.576                                     | <b>1.283</b>  | 1.576                                     | <b>1.283</b>  |
| Deltae        | 0.514                                     | <b>0.445</b>  | 0.514                                     | <b>0.445</b>  | 0.514                                     | <b>0.445</b>  |
| Encut         | <b>315.0</b>                              | 351.2         | <b>315.0</b>                              | 357.4         | <b>315.0</b>                              | 357.4         |
| Ehull         | 0.342                                     | <b>0.298</b>  | 0.342                                     | <b>0.298</b>  | 0.342                                     | <b>0.298</b>  |
| Magoszi       | 2.928                                     | <b>2.674</b>  | 2.928                                     | <b>2.674</b>  | 2.928                                     | <b>2.674</b>  |
| Magout        | 2.618                                     | <b>2.273</b>  | 2.618                                     | <b>2.273</b>  | 2.618                                     | <b>2.273</b>  |
| Eps           | 4.976                                     | <b>4.284</b>  | 4.976                                     | <b>4.626</b>  | <b>4.051</b>                              | 4.626         |
| PPF           | 1801.9                                    | <b>1720.3</b> | 1801.9                                    | <b>1741.8</b> | <b>1415.1</b>                             | 1741.8        |
| NPF           | 1951.6                                    | <b>1718.9</b> | 1951.6                                    | <b>1765.9</b> | <b>1413.3</b>                             | 1765.9        |
| Pem300k       | <b>4.145</b>                              | 4.195         | 4.145                                     | <b>4.113</b>  | <b>3.449</b>                              | 4.113         |
| Nem300k       | 4.197                                     | <b>4.172</b>  | 4.197                                     | <b>4.129</b>  | <b>3.449</b>                              | 4.129         |
| PSB           | 325.8                                     | <b>226.5</b>  | 325.8                                     | <b>314.1</b>  | <b>218.7</b>                              | 314.1         |
| NSB           | 371.7                                     | <b>371.6</b>  | 371.7                                     | <b>371.6</b>  | <b>167.6</b>                              | 371.6         |
| Meps          | 7.312                                     | <b>6.521</b>  | 7.312                                     | <b>6.796</b>  | <b>6.003</b>                              | 6.796         |
| MaxM          | 249.4                                     | <b>214.0</b>  | 249.4                                     | <b>214.0</b>  | <b>213.8</b>                              | 214.0         |
| MinM          | 174.5                                     | <b>167.4</b>  | 174.5                                     | <b>131.2</b>  | 174.5                                     | <b>131.2</b>  |
| ETC11         | 126.7                                     | <b>114.8</b>  | 126.7                                     | <b>118.7</b>  | 119.0                                     | <b>118.7</b>  |
| ETC12         | 63.72                                     | <b>63.55</b>  | 63.72                                     | <b>61.73</b>  | <b>51.37</b>                              | 61.73         |
| ETC13         | 50.93                                     | <b>46.46</b>  | 50.93                                     | <b>46.96</b>  | 47.06                                     | <b>46.96</b>  |
| ETC22         | 124.8                                     | <b>120.7</b>  | 124.8                                     | <b>118.8</b>  | 121.0                                     | <b>118.8</b>  |
| ETC33         | 122.3                                     | <b>118.1</b>  | 122.3                                     | <b>115.3</b>  | 120.0                                     | <b>115.3</b>  |
| ETC44         | 57.99                                     | <b>54.29</b>  | 57.99                                     | <b>50.75</b>  | 50.98                                     | <b>50.75</b>  |
| ETC55         | 50.31                                     | <b>38.79</b>  | 50.31                                     | <b>38.78</b>  | 40.57                                     | <b>38.78</b>  |
| ETC66         | 51.26                                     | <b>51.18</b>  | 51.26                                     | <b>45.63</b>  | 47.17                                     | <b>45.63</b>  |
| BulkKV        | 40.96                                     | <b>40.79</b>  | 40.96                                     | <b>37.34</b>  | 40.96                                     | <b>37.34</b>  |
| ShearGV       | 43.96                                     | <b>39.20</b>  | 43.96                                     | <b>39.54</b>  | 43.96                                     | <b>39.54</b>  |
| BgMbj         | 2.075                                     | <b>2.010</b>  | 2.075                                     | <b>2.066</b>  | 2.075                                     | <b>2.066</b>  |
| Spillage      | 1.508                                     | <b>1.353</b>  | 1.508                                     | <b>1.429</b>  | 1.568                                     | <b>1.429</b>  |
| SLME          | 21.81                                     | <b>19.60</b>  | 21.81                                     | <b>19.28</b>  | 21.81                                     | <b>19.28</b>  |
| MaxlrM        | 487.5                                     | <b>425.3</b>  | 487.5                                     | <b>442.1</b>  | <b>271.1</b>                              | 442.1         |
| MinlrM        | 184.2                                     | <b>153.2</b>  | 184.2                                     | <b>172.2</b>  | <b>128.1</b>                              | 172.2         |
| PMDIEI        | <b>11.90</b>                              | 13.95         | 11.90                                     | 12.80         | 13.41                                     | <b>12.80</b>  |
| PMDi          | 11.65                                     | <b>11.34</b>  | 11.65                                     | <b>11.34</b>  | 14.77                                     | <b>11.34</b>  |
| PMDIo         | <b>2.786</b>                              | 3.245         | 2.786                                     | <b>2.662</b>  | 2.786                                     | <b>2.662</b>  |
| PMEij         | 1.734                                     | <b>1.633</b>  | 1.734                                     | <b>1.287</b>  | 1.734                                     | <b>1.287</b>  |
| PMDj          | 102.16                                    | <b>93.21</b>  | 102.16                                    | <b>98.11</b>  | 129.7                                     | <b>98.11</b>  |
| Exfoli        | 240.5                                     | <b>196.9</b>  | 240.5                                     | <b>184.7</b>  | 229.0                                     | <b>184.7</b>  |
| Expt Deltae   | 0.264                                     | <b>0.196</b>  | 0.264                                     | <b>0.196</b>  | 0.264                                     | <b>0.196</b>  |
| Expt Band Gap | 2.238                                     | <b>1.667</b>  | 2.238                                     | <b>1.667</b>  | 2.304                                     | <b>1.667</b>  |

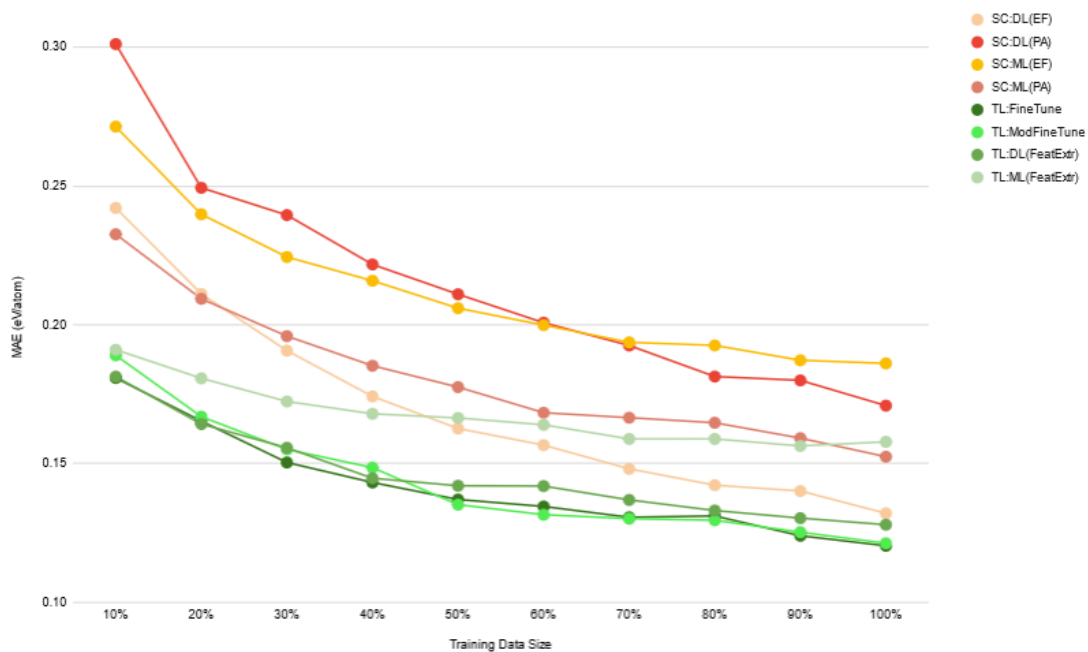

Supplementary Figure 1: Training curve for prediction accuracy of target formation energy for different training data sizes on a fixed test set.

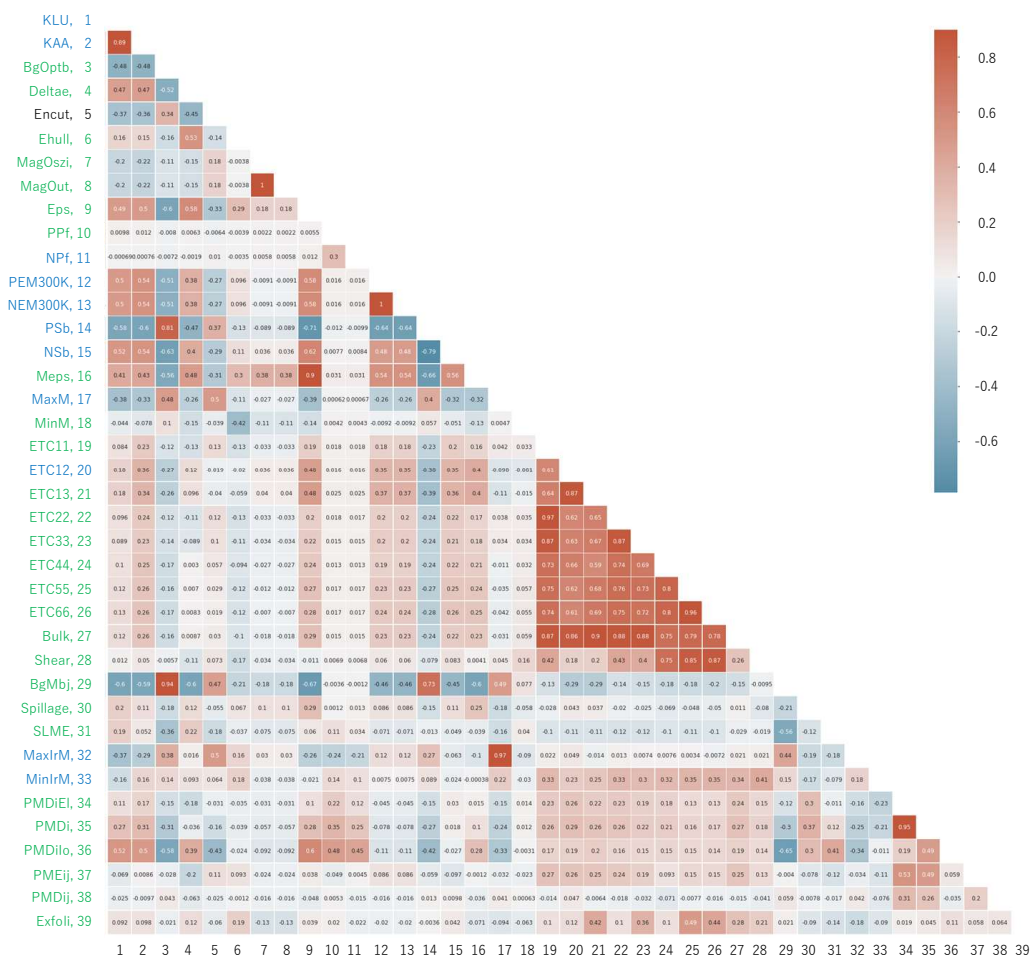

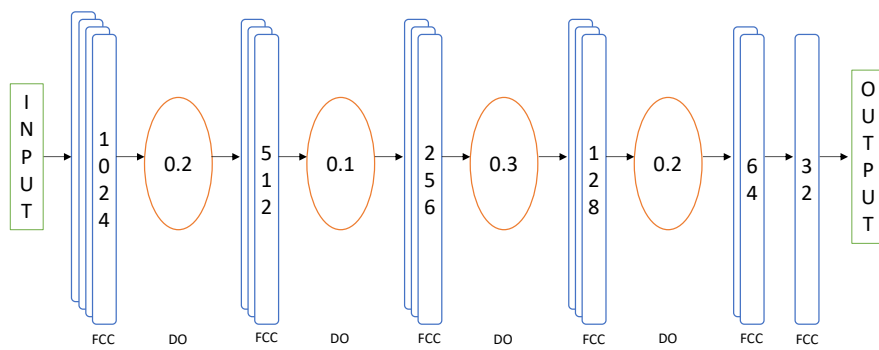

Supplementary Figure 3: Architecture of the DL model (ElemNet) used in this work. The stacked structure represents same layer connected continuously. FCC and DO represents the fully connected layer and Dropout respectively. Dropout is not applied during the validation/testing phase for improved performance.

## Supplementary References

1. Nadeau, C. & Bengio, Y. Inference for the generalization error. *Machine learning* **52**, 239–281 (2003).
